# Supplementary material for: Learning unfamiliar pitch intervals: A novel paradigm for demonstrating the learning of statistical associations between musical pitches
Source: PLoS One. 2018 Aug 30;13(8):e0203026. doi: 10.1371/journal.pone.0203026 (PMC6117015; doi:10.1371/journal.pone.0203026)
Supplement: S1 Data — (XLSX) [file pone.0203026.s003.xlsx]

## Sheet: Sheet2
Reaction Time in correct timbre shift detection (Test Phases)												Reaction Time in correct timbre shift detection (Exposure Phase)
ID	Scale	TestPhase	Congruency	No. of correct detection	Mean RT	SD	SE	5% CI	Confidence Intervals			Exposure - Control
1	Control	Immediate	Congruent	28	1040	197.165	37.2607	73.0296	966.97	1113.03		ID	N	Mean RT	SD	SE	Confidence Intervals
1	Control	Immediate	Incongruent	24	938.417	170.532	34.8096	68.2256	870.191	1006.64		1	30	911.667	149.523	27.299	858.162	965.172
1	Control	Later	Congruent	30	926.533	189.968	34.6832	67.9778	858.556	994.511		2	28	985.571	194.862	36.8254	913.395	1057.75
1	Control	Later	Incongruent	24	844.917	83.6472	17.0744	33.4653	811.451	878.382		3	23	1101.57	143.408	29.9026	1042.96	1160.17
1	Microtonal	Immediate	Congruent	30	931.533	150.817	27.5353	53.9683	877.565	985.502		4	29	922.172	215.325	39.9848	843.804	1000.54
1	Microtonal	Immediate	Incongruent	25	890.56	139.269	27.8538	54.5924	835.968	945.152		5	27	1092.52	179.52	34.5487	1024.8	1160.23
1	Microtonal	Later	Congruent	30	999.533	121.439	22.1717	43.4557	956.078	1042.99		6	8	793.75	446.993	158.036	484.006	1103.49
1	Microtonal	Later	Incongruent	23	1004.26	163.173	34.024	66.6858	937.575	1070.95		7	30	725.333	65.299	11.9219	701.967	748.7
2	Control	Immediate	Congruent	30	892.8	99.1573	18.1036	35.4823	857.318	928.282		8	30	881.067	133.481	24.3703	833.302	928.832
2	Control	Immediate	Incongruent	24	856.583	150.884	30.7991	60.3652	796.218	916.948		9	30	824.4	80.9502	14.7794	795.433	853.367
2	Control	Later	Congruent	30	768.4	78.4916	14.3305	28.0874	740.313	796.487		10	29	923.241	155.35	28.8477	866.701	979.782
2	Control	Later	Incongruent	25	794.88	80.6124	16.1225	31.5995	763.281	826.479		11	29	932.69	146.713	27.2439	879.293	986.087
2	Microtonal	Immediate	Congruent	30	814.867	94.9551	17.3363	33.9786	780.888	848.845		12	30	880.067	116.26	21.226	838.465	921.669
2	Microtonal	Immediate	Incongruent	25	797.36	115.434	23.0867	45.2491	752.111	842.609		13	9	938.667	353.589	117.863	707.66	1169.67
2	Microtonal	Later	Congruent	30	763.8	86.2816	15.7528	30.8749	732.925	794.675		14	30	1075.4	155.201	28.3358	1019.86	1130.94
2	Microtonal	Later	Incongruent	25	796.48	69.0152	13.803	27.0534	769.427	823.533		15	29	985.655	135.956	25.2464	936.173	1035.14
3	Control	Immediate	Congruent	25	918.08	135.809	27.1619	53.2363	864.844	971.316		16	26	962.385	141.322	27.7155	908.063	1016.71
3	Control	Immediate	Incongruent	20	845.2	152.057	34.0011	66.6408	778.559	911.841		17	18	1021.22	209.393	49.3543	924.49	1117.95
3	Control	Later	Congruent	30	922.467	110.619	20.1962	39.5838	882.883	962.051		18	29	1041.31	158.801	29.4886	983.514	1099.11
3	Control	Later	Incongruent	24	861.667	126.105	25.7411	50.4516	811.215	912.118		19	26	1115.04	166.344	32.6228	1051.1	1178.98
3	Microtonal	Immediate	Congruent	28	948.286	222.778	42.101	82.5164	865.769	1030.8		20	29	1000.17	130.381	24.2111	952.719	1047.63
3	Microtonal	Immediate	Incongruent	23	906.435	167.956	35.0212	68.6402	837.795	975.075		21	28	839.429	102.194	19.3128	801.576	877.281
3	Microtonal	Later	Congruent	29	854.483	60.7775	11.2861	22.1203	832.362	876.603		Exposure-Microtonal
3	Microtonal	Later	Incongruent	25	854.48	128.594	25.7188	50.4079	804.072	904.888		1	59	964.644	169.692	22.092	921.345	1007.94
4	Control	Immediate	Congruent	29	947.207	153.013	28.4138	55.6901	891.517	1002.9		2	60	853.933	110.424	14.2556	825.993	881.874
4	Control	Immediate	Incongruent	25	841.92	116.275	23.255	45.579	796.341	887.499		3	57	915.228	112.396	14.8872	886.05	944.406
4	Control	Later	Congruent	30	827.133	103.222	18.8457	36.9369	790.196	864.07		4	59	884.119	108.301	14.0996	856.484	911.753
4	Control	Later	Incongruent	25	823.36	85.4453	17.0891	33.494	789.866	856.854		5	58	942.121	131.417	17.2559	908.3	975.942
4	Microtonal	Immediate	Congruent	28	875.857	97.2895	18.386	36.0359	839.821	911.893		6	60	973.067	148.148	19.1258	935.581	1010.55
4	Microtonal	Immediate	Incongruent	24	888.25	134.682	27.4918	53.883	834.367	942.133		7	59	736.881	120.358	15.6693	706.17	767.593
4	Microtonal	Later	Congruent	30	795.667	112.303	20.5036	40.1862	755.48	835.853		8	56	926.929	117.781	15.7392	896.08	957.777
4	Microtonal	Later	Incongruent	25	815.12	95.6017	19.1203	37.4752	777.645	852.595		9	60	847.533	118.806	15.3377	817.472	877.595
5	Control	Immediate	Congruent	29	1058.93	158.086	29.3558	57.5363	1001.39	1116.47		10	59	971.424	129.596	16.8719	938.355	1004.49
5	Control	Immediate	Incongruent	23	953.913	109.87	22.9095	44.9018	909.011	998.815		11	57	857.333	124.093	16.4365	825.118	889.548
5	Control	Later	Congruent	30	905.967	134.557	24.5666	48.1497	857.817	954.116		12	60	858.8	74.2887	9.59063	840.003	877.597
5	Control	Later	Incongruent	24	868.458	115.335	23.5426	46.1426	822.316	914.601		13	51	902.039	156.505	21.915	859.087	944.992
5	Microtonal	Immediate	Congruent	29	1042.31	200.556	37.2424	72.9937	969.317	1115.3		14	50	1129.9	156.638	22.152	1086.48	1173.32
5	Microtonal	Immediate	Incongruent	22	949.545	128.488	27.3937	53.6907	895.855	1003.24		15	57	1024.84	137.586	18.2237	989.124	1060.56
5	Microtonal	Later	Congruent	30	905.967	134.557	24.5666	48.1497	857.817	954.116		16	60	831.5	101.661	13.1243	805.777	857.223
5	Microtonal	Later	Incongruent	24	868.458	115.335	23.5426	46.1426	822.316	914.601		17	58	854.259	135.106	17.7403	819.488	889.029
6	Control	Immediate	Congruent	27	964.667	162.707	31.313	61.3723	903.294	1026.04		18	59	970.61	148.746	19.365	932.655	1008.56
6	Control	Immediate	Incongruent	24	941.333	165.828	33.8496	66.3439	874.989	1007.68		19	56	1094.25	154.232	20.6102	1053.85	1134.65
6	Control	Later	Congruent	24	966.333	169.656	34.6309	67.8753	898.458	1034.21		20	57	937.439	125.304	16.5969	904.909	969.968
6	Control	Later	Incongruent	22	963.273	190.208	40.5526	79.4816	883.791	1042.75		21	60	882.417	94.5027	12.2002	858.505	906.329
6	Microtonal	Immediate	Congruent	23	999.304	164.94	34.3924	67.4079	931.896	1066.71
6	Microtonal	Immediate	Incongruent	24	974.583	164.437	33.5655	65.7872	908.796	1040.37
6	Microtonal	Later	Congruent	28	900.643	196.202	37.0786	72.6728	827.97	973.316
6	Microtonal	Later	Incongruent	21	925.714	179.12	39.0873	76.6096	849.105	1002.32
7	Control	Immediate	Congruent	29	749.655	45.8447	8.51314	16.6855	732.97	766.341
7	Control	Immediate	Incongruent	21	710.857	111.817	24.4006	47.8242	663.033	758.681
7	Control	Later	Congruent	30	702.733	95.8555	17.5007	34.3008	668.432	737.034
7	Control	Later	Incongruent	25	697.28	64.2362	12.8472	25.1801	672.1	722.46
7	Microtonal	Immediate	Congruent	29	723.69	65.2589	12.1183	23.7514	699.938	747.441
7	Microtonal	Immediate	Incongruent	25	712.08	42.8466	8.56931	16.7955	695.284	728.876
7	Microtonal	Later	Congruent	30	699.467	63.6433	11.6196	22.774	676.693	722.241
7	Microtonal	Later	Incongruent	24	700.333	41.6013	8.49183	16.6437	683.69	716.977
8	Control	Immediate	Congruent	27	964.815	135.132	26.0062	50.9712	913.844	1015.79
8	Control	Immediate	Incongruent	25	719.68	146.123	29.2246	57.2791	662.401	776.959
8	Control	Later	Congruent	29	856.345	105.668	19.6221	38.4585	817.886	894.803
8	Control	Later	Incongruent	24	783.667	153.656	31.365	61.4743	722.192	845.141
8	Microtonal	Immediate	Congruent	27	977.704	182.042	35.034	68.6654	909.038	1046.37
8	Microtonal	Immediate	Incongruent	24	878.75	115.48	23.5722	46.2007	832.549	924.951
8	Microtonal	Later	Congruent	28	822.071	107.491	20.3138	39.8143	782.257	861.886
8	Microtonal	Later	Incongruent	25	835.2	129.43	25.8859	50.7354	784.465	885.935
9	Control	Immediate	Congruent	30	809.133	46.8473	8.55311	16.7638	792.37	825.897
9	Control	Immediate	Incongruent	24	802.583	57.7867	11.7957	23.1191	779.464	825.702
9	Control	Later	Congruent	30	768.867	45.2234	8.25662	16.1827	752.684	785.049
9	Control	Later	Incongruent	25	748.8	82.7204	16.5441	32.4258	716.374	781.226
9	Microtonal	Immediate	Congruent	29	786.483	48.0525	8.92313	17.489	768.994	803.972
9	Microtonal	Immediate	Incongruent	25	795.84	62.9548	12.591	24.6778	771.162	820.518
9	Microtonal	Later	Congruent	30	781.067	86.5583	15.8033	30.9739	750.093	812.041
9	Microtonal	Later	Incongruent	24	773.583	67.3446	13.7467	26.943	746.64	800.526
10	Control	Immediate	Congruent	19	937.895	120.23	27.5827	54.0611	883.834	991.956
10	Control	Immediate	Incongruent	24	803.167	185.827	37.9318	74.345	728.822	877.512
10	Control	Later	Congruent	28	912.286	105.02	19.847	38.8993	873.386	951.185
10	Control	Later	Incongruent	25	849.92	88.1901	17.638	34.5699	815.35	884.49
10	Microtonal	Immediate	Congruent	25	942	141.605	28.321	55.5082	886.492	997.508
10	Microtonal	Immediate	Incongruent	23	862.783	166.23	34.6613	67.9348	794.848	930.717
10	Microtonal	Later	Congruent	30	904.267	96.2178	17.5669	34.4305	869.836	938.697
10	Microtonal	Later	Incongruent	24	834.333	70.948	14.4822	28.3846	805.949	862.718
11	Control	Immediate	Congruent	28	871.143	82.2884	15.5511	30.4795	840.663	901.622
11	Control	Immediate	Incongruent	25	853.76	190.025	38.005	74.4884	779.272	928.248
11	Control	Later	Congruent	27	811.926	105.549	20.3129	39.8126	772.113	851.739
11	Control	Later	Incongruent	25	805.56	104.158	20.8316	40.8291	764.731	846.389
11	Microtonal	Immediate	Congruent	30	843.4	96.2427	17.5714	34.4394	808.961	877.839
11	Microtonal	Immediate	Incongruent	24	849.417	123.843	25.2794	49.5468	799.87	898.964
11	Microtonal	Later	Congruent	30	791.933	127.529	23.2835	45.6348	746.298	837.568
11	Microtonal	Later	Incongruent	24	833.417	191.159	39.0202	76.4782	756.939	909.895
12	Control	Immediate	Congruent	29	914.207	111.691	20.7406	40.6508	873.556	954.858
12	Control	Immediate	Incongruent	25	864.08	112.506	22.5011	44.1014	819.979	908.181
12	Control	Later	Congruent	30	964.067	122.977	22.4524	44.006	920.061	1008.07
12	Control	Later	Incongruent	25	924.12	108.843	21.7686	42.6656	881.454	966.786
12	Microtonal	Immediate	Congruent	30	860.2	58.1706	10.6205	20.8157	839.384	881.016
12	Microtonal	Immediate	Incongruent	25	859.52	93.5829	18.7166	36.6838	822.836	896.204
12	Microtonal	Later	Congruent	30	964.067	122.977	22.4524	44.006	920.061	1008.07
12	Microtonal	Later	Incongruent	25	924.12	108.843	21.7686	42.6656	881.454	966.786
13	Control	Immediate	Congruent	22	985.455	202.38	43.1476	84.5678	900.887	1070.02
13	Control	Immediate	Incongruent	24	905.083	190.867	38.9606	76.3613	828.722	981.445
13	Control	Later	Congruent	30	900.067	201.538	36.7956	72.1181	827.949	972.185
13	Control	Later	Incongruent	21	799.714	192.342	41.9724	82.2644	717.45	881.979
13	Microtonal	Immediate	Congruent	27	935.037	167.727	32.2791	63.2659	871.771	998.303
13	Microtonal	Immediate	Incongruent	23	900.174	181.931	37.9352	74.3517	825.822	974.526
13	Microtonal	Later	Congruent	27	890	206.809	39.8005	78.0075	811.992	968.008
13	Microtonal	Later	Incongruent	23	899.217	224.515	46.8145	91.7548	807.463	990.972
14	Control	Immediate	Congruent	27	1090.3	170.012	32.7189	64.1279	1026.17	1154.42
14	Control	Immediate	Incongruent	19	995.895	199.034	45.6615	89.4948	906.4	1085.39
14	Control	Later	Congruent	23	1102.35	181.309	37.8055	74.0975	1028.25	1176.45
14	Control	Later	Incongruent	22	1060	209.369	44.6376	87.4882	972.512	1147.49
14	Microtonal	Immediate	Congruent	18	1160.11	158.505	37.3601	73.2245	1086.89	1233.34
14	Microtonal	Immediate	Incongruent	20	1130.5	195.603	43.7382	85.7253	1044.77	1216.23
14	Microtonal	Later	Congruent	22	1148.27	249.377	53.1674	104.206	1044.07	1252.48
14	Microtonal	Later	Incongruent	19	1124.32	157.142	36.0507	70.6581	1053.66	1194.97
15	Control	Immediate	Congruent	16	1031	142.507	35.6268	69.8272	961.173	1100.83
15	Control	Immediate	Incongruent	19	882.842	245.885	56.4098	110.561	772.281	993.403
15	Control	Later	Congruent	27	966.593	162.62	31.2962	61.3394	905.253	1027.93
15	Control	Later	Incongruent	24	851	139.278	28.4299	55.7216	795.278	906.722
15	Microtonal	Immediate	Congruent	25	1039.6	145.029	29.0057	56.8502	982.75	1096.45
15	Microtonal	Immediate	Incongruent	24	916.667	205.374	41.9217	82.165	834.502	998.832
15	Microtonal	Later	Congruent	29	995.103	166.062	30.837	60.4395	934.664	1055.54
15	Microtonal	Later	Incongruent	20	886.1	178.814	39.9841	78.3673	807.733	964.467
16	Control	Immediate	Congruent	25	978.48	185.642	37.1285	72.7705	905.71	1051.25
16	Control	Immediate	Incongruent	25	874.88	192.331	38.4663	75.3925	799.487	950.273
16	Control	Later	Congruent	27	815.778	95.5765	18.3937	36.051	779.727	851.829
16	Control	Later	Incongruent	25	793.12	69.3423	13.8685	27.1817	765.938	820.302
16	Microtonal	Immediate	Congruent	30	840.267	146.398	26.7286	52.387	787.88	892.654
16	Microtonal	Immediate	Incongruent	24	753.5	100.271	20.4678	40.1162	713.384	793.616
16	Microtonal	Later	Congruent	30	797.533	81.0239	14.7929	28.9935	768.54	826.527
16	Microtonal	Later	Incongruent	22	806.091	103.092	21.9793	43.0787	763.012	849.17
17	Control	Immediate	Congruent	28	912.571	133.705	25.2678	49.5241	863.047	962.095
17	Control	Immediate	Incongruent	23	871.043	189.949	39.6071	77.6286	793.415	948.672
17	Control	Later	Congruent	30	887.067	152.637	27.8676	54.6195	832.447	941.686
17	Control	Later	Incongruent	24	898.667	160.309	32.723	64.1358	834.531	962.802
17	Microtonal	Immediate	Congruent	29	982.759	198.272	36.8182	72.1624	910.596	1054.92
17	Microtonal	Immediate	Incongruent	24	934.875	214.181	43.7196	85.6888	849.186	1020.56
17	Microtonal	Later	Congruent	28	871.679	124.152	23.4625	45.9857	825.693	917.664
17	Microtonal	Later	Incongruent	25	847.92	104.27	20.8539	40.873	807.047	888.793
18	Control	Immediate	Congruent	28	1101.5	147.338	27.8444	54.5739	1046.93	1156.07
18	Control	Immediate	Incongruent	25	1031.68	169.124	33.8248	66.2954	965.385	1097.98
18	Control	Later	Congruent	26	854.769	120.366	23.6058	46.2664	808.503	901.036
18	Control	Later	Incongruent	25	847.2	117.949	23.5898	46.2352	800.965	893.435
18	Microtonal	Immediate	Congruent	30	933.867	153.734	28.0679	55.012	878.855	988.879
18	Microtonal	Immediate	Incongruent	25	906.16	153.4	30.6801	60.1318	846.028	966.292
18	Microtonal	Later	Congruent	28	851.5	130.538	24.6694	48.3511	803.149	899.851
18	Microtonal	Later	Incongruent	25	829.44	87.2	17.44	34.1818	795.258	863.622
19	Control	Immediate	Congruent	26	1096.88	129.434	25.3841	49.7519	1047.13	1146.64
19	Control	Immediate	Incongruent	23	918.913	206.371	43.0313	84.3399	834.573	1003.25
19	Control	Later	Congruent	27	999.63	167.538	32.2427	63.1945	936.435	1062.82
19	Control	Later	Incongruent	23	997.478	211.39	44.0779	86.3912	911.087	1083.87
19	Microtonal	Immediate	Congruent	30	1092.43	158.016	28.8496	56.5441	1035.89	1148.98
19	Microtonal	Immediate	Incongruent	23	982.783	152.883	31.8784	62.4805	920.302	1045.26
19	Microtonal	Later	Congruent	27	999.63	167.538	32.2427	63.1945	936.435	1062.82
19	Microtonal	Later	Incongruent	23	997.478	211.39	44.0779	86.3912	911.087	1083.87
20	Control	Immediate	Congruent	29	969.862	115.703	21.4855	42.1108	927.751	1011.97
20	Control	Immediate	Incongruent	23	1013.96	181.272	37.7977	74.0822	939.874	1088.04
20	Control	Later	Congruent	30	933.933	104.83	19.1393	37.5123	896.421	971.446
20	Control	Later	Incongruent	25	883.76	59.1504	11.8301	23.1865	860.573	906.947
20	Microtonal	Immediate	Congruent	30	933.4	114.195	20.8491	40.8636	892.536	974.264
20	Microtonal	Immediate	Incongruent	25	902.88	75.7118	15.1424	29.6785	873.202	932.558
20	Microtonal	Later	Congruent	30	882.933	94.5519	17.2627	33.8343	849.099	916.768
20	Microtonal	Later	Incongruent	25	900.16	131.598	26.3196	51.5854	848.575	951.745
21	Control	Immediate	Congruent	28	931.429	171.047	32.3249	63.3556	868.073	994.784
21	Control	Immediate	Incongruent	25	885.84	80.3283	16.0657	31.4881	854.352	917.328
21	Control	Later	Congruent	30	873.333	102.624	18.7365	36.7228	836.61	910.056
21	Control	Later	Incongruent	25	883.2	123.849	24.7699	48.5481	834.652	931.748
21	Microtonal	Immediate	Congruent	29	850.828	56.2939	10.4535	20.4885	830.339	871.316
21	Microtonal	Immediate	Incongruent	24	838	127.286	25.9822	50.9241	787.076	888.924
21	Microtonal	Later	Congruent	30	845.667	101.91	18.6062	36.4674	809.199	882.134
21	Microtonal	Later	Incongruent	25	868	93.0645	18.6129	36.4806	831.519	904.481
